# Supplementary material for: Epileptogenic Brain Malformations and Mutations in Tubulin Genes: A Case Report and Review of the Literature
Source: Int J Mol Sci. 2017 Oct 29;18(11):2273. doi: 10.3390/ijms18112273 (PMC5713243; doi:10.3390/ijms18112273)
Supplement: Supplementary file 1 [file ijms-18-02273-s001.xls]

## Sheet: Foglio1
ACTB
ACTG1
ADGRG1
AMPD2
ARFGEF2
ARX
ASNS
ASPM
ATRX
CASK
CCND2
CDK5RAP2
CENPJ
CEP135
CEP152
COL4A1
CUL4B
DCHS1
DCX
DNAI1
DYNC1H1
EMX2
EXOSC3
EZH2
FAT4
FIG4
FKRP
FKTN
FLNA
FOXC1
GLI2
GNAQ
IER3IP1
ISPD
KATNB1
KIAA1279
KIF2A
KIF5C
LAMA2
LAMB1
LAMC3
LARGE
MCPH1
NDE1
NFIX
NHEJ1
NSD1
OCLN
OPHN1
PAFAH1B1
PAX6
POMGNT1
POMT1
POMT2
PQBP1
QARS
RAB18
RAB3GAP1
RAB3GAP2
RARS2
RELN
RTTN
SCN1A
SHH
SIX3
SLC25A19
STIL
TGIF1
TMEM5
TSC1
TSC2
TSEN15
TSEN2
TSEN34
TSEN54
TUBA1A
TUBA8
TUBB
TUBB1
TUBB2A
TUBB2B
TUBB3
TUBG1
VLDLR
VRK1
WDR62
